# Supplementary material for: Water–Rock Interactions across Volcanic Aquifers of the Lece Andesite Complex (Southern Serbia): Geochemistry and Environmental Impact
Source: MDPI journal article supplement (doi:10.3390/w15203653), 2023-10-18
Supplement: s1 [file s1]

Table S1 Minor and trace elements in groundwater and Goldshmit classification of elements

| samples                                      | Litophile elements                                                                     | Chalcophile elements                      | Siderophile elements |
|----------------------------------------------|----------------------------------------------------------------------------------------|-------------------------------------------|----------------------|
| Sijb,Siji, Tul1, Tul2, Kurb, Vici, Suva Vicb | Si, F, B, Li, Rb, Sr, Sc, Cr Be, Mn, Ba, Cs;<br>occasionaly: W, I, Al, Zr, Y, V, U, Nb | As, Cu;<br>occasionaly:<br>Ge, Se, Te, Tl | Fe                   |
| Prol                                         | Si, F, B, Li, Rb, Sr, Sc, Cr, Cs, U                                                    | As                                        | Fe                   |
| Ploc                                         | Si, F, B, Li, Rb, Sr, Sc, Cr, Al, Ba, Cs, I, Mn                                        | Ge, Cu, Se                                | Fe                   |
| Djavv                                        | Si, F, B, Li, Rb, Sr, Sc, Cr, Al, Be, Cd, Mn, Th, V, Y, U, REE                         | Ge, As, Cu, Se, Ga, Pb, Zn, In            | Fe, Co, Ni, Re       |

Table S2 Pearson's coefficient

[illegible]
